# Supplementary material for: Clonal Hematopoiesis Before, During, and After Human Spaceflight
Source: PubMed Central journal article supplement — Cell Rep. Author manuscript; Available in PMC 2022 Aug 23. (PMC9398182; doi:10.1016/j.celrep.2020.108458), 2020-11-25
Supplement: NIHMS1827326-supplement-1.pdf [file NIHMS1827326-supplement-1.pdf]

**Supplemental Information**

**Clonal Hematopoiesis Before, During,  
and After Human Spaceflight**

**Nuria Mencia-Trinchant, Matthew J. MacKay, Christopher Chin, Ebrahim Afshinnekoo, Jonathan Foox, Cem Meydan, Daniel Butler, Christopher Mozsary, Nicholas A. Vernice, Charlotte Darby, Michael C. Schatz, Susan M. Bailey, Ari M. Melnick, Monica L. Guzman, Kelly Bolton, Lior Z. Braunstein, Francine Garrett-Bakelman, Ross L. Levine, Duane C. Hassane, and Christopher E. Mason**



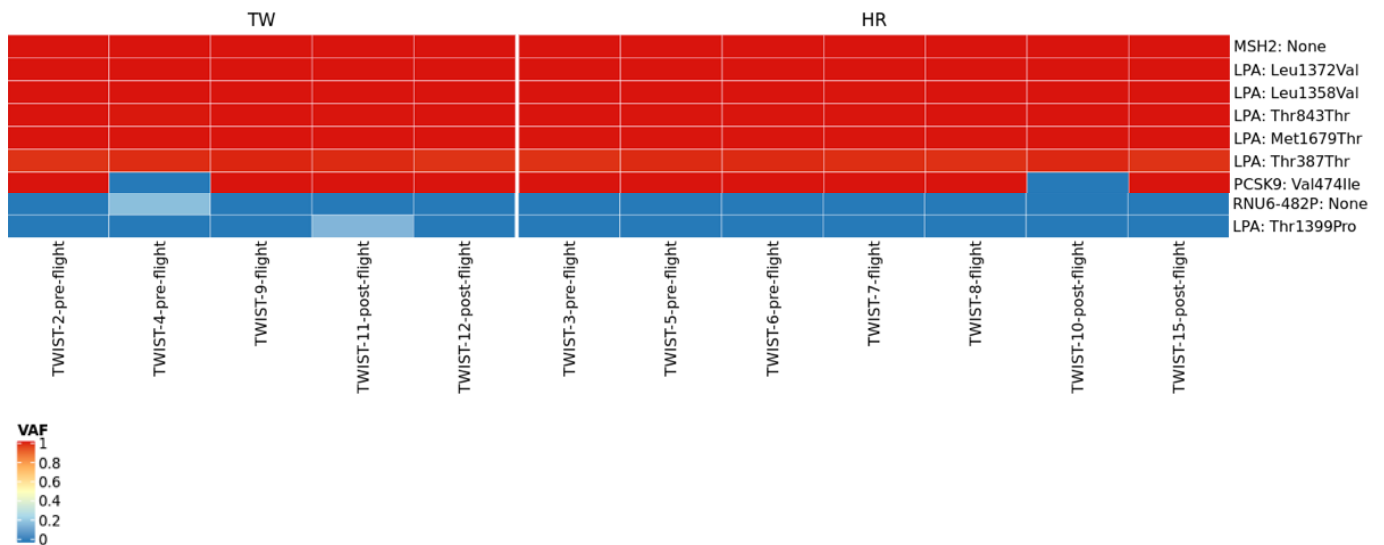

**Figure S2. Alternate alleles from the Twist Panel. Related to Figure 2.** Other non-reference alleles were usually stable or transient, whereas the robust CH mutations (Figure 1) persisted and were detected at all time points. Variant allele fraction (VAF) is shown from highest (red) to lowest (blue). Cells are sorted CD4<sup>+</sup> fractions and sequenced with the Twist capture panel.
